# Supplementary material for: Global Faculty Networks and U.S. Doctoral Graduates' Monopoly: The Pareto Principle in Academia
Source: Research Square preprint supplement (doi:10.21203/rs.3.rs-6662486/v1), 2025-06-20
Supplement: Supplementary file 1 [file d23af1dab6da3fc7705d735d.docx]

**Supporting Information for**

Global Faculty Networks and U.S. Doctoral Graduates' Monopoly: The Pareto Principle in Academia

**This PDF file includes:**

Supporting text

Figures S1

Supporting Information Text

**1 Data Sources and Processing**

Focusing on the career trajectories and institutional affiliations of academic staff, the analysis employed ORCID database.

We obtained publicly available registration information from the official ORCID website up to October 1st, 2022. The ORCID (Open Researcher and Contributor ID), a system that assigns unique identifiers to researchers, is widely recognized and boasts a substantial number of registrants worldwide. Existing research indicates that it serves as a valuable data source, functioning as a comprehensive open science database comprising researchers' outputs and biographical information.

This database offers crucial data on individuals' academic and career trajectories, including positions, titles, affiliations, and timestamps. For details on data preparation and annotation, please refer to the Data preparation section.

**2 Selection of Sample Countries**

From our dataset, we selected specific countries to establish a comparative framework and specifically examined the academic talent exchange networks among them. Initially, we chose the United States due to its unparalleled influence in academia and its central position in the international academic labor market. Moreover, research on the classification of higher education systems found that the United States, along with three other countries-the United Kingdom, Canada, and Australia, share similar systems (*1,2*). This similarity provides a basis for the active exchange of talent among these countries, facilitated by shared language and cultural backgrounds, comparable education and research systems, and common research interests and focus areas. For example, among internationally trained faculty in the United States, over 35% received training in either the United Kingdom or Canada (*3*). These four countries are integral to our research framework. Finally, we selected China as a representative of developing countries.

To examine the general characteristics within and across academic systems and to deepen our understanding of academic stratification and prestige hierarchies, this study focuses on countries and regions with elite higher education systems. In total, 20 countries/regions have been selected for analysis, each known for its strong academic institutions and faculty networks. These targeted countries and regions include: the United States, Canada, Australia, China, Japan, New Zealand, Italy, Germany, Switzerland, the Netherlands, Israel, France, the United Kingdom, Sweden, Singapore, Ireland, Norway, Belgium, Finland, and Hong Kong, China.

**3 Data preparation**

The data preparation process for ORCID involved ten distinct steps:

The first step in preparing the dataset was to clean the names of university institutions. Differently expressed institution names and their sub-branches are consolidated into a single standardized institution name to ensure consistency across the dataset. Then a unique code is assigned to each university institution in both datasets, facilitating easy identification and comparison.

The second step in preparing the dataset was to clean the geographical locations of each institution, including the country, region, and continent. This ensures that in the subsequent sample selection, the current workplaces of faculty members are located clearly.

The third step in preparing the dataset was to annotate the types of institutions associated with individuals' career experiences. The categories include universities, laboratories, government and nonprofit organizations, and industry. In this step, individuals currently employed at universities are selected as research subjects, and experiences outside universities are considered non-academic.

The fourth step in preparing the dataset was to clean the job titles of individuals, retaining those with research experience. The sample includes individuals with a Ph.D. in various academic positions, such as tenured faculty and full-time non-tenure-track faculty, excluding administrative staff and current students. Referring to the tenure-track system in the United States, we annotated tenure-track samples for other countries. However, it's important to note that the analysis extends beyond core tenure-track faculty, as different universities have varied tenure standards determined by internal committees and bodies. In recent years, the absolute number of full-time faculty members has increased, but the proportion of core tenure-track faculty—full-time assistant, associate, and full professors—has structurally declined. At some doctoral degree–granting institutions, there has also been an increase in the number of full-time non-tenure-track faculty (*4*). Non-tenure-track faculty play critical roles in some universities, occupy many teaching positions, and are influenced by the institution's reputation, necessitating their inclusion in the analysis.

The fifth step in preparing the dataset involved cleaning faculty members' degrees by collecting information on their highest degree, creating a separate column to record this information. During the analysis of degree information, emphasis was placed on samples holding doctoral degrees.

The sixth step in preparing the dataset was to encode the academic fields of academic personnel based on department names. For ORCID data, we organized departmental affiliations into 3 categories and 11 subcategories.

The seventh step in preparing the dataset involves further comparing the characteristics of different university faculty groups. Faculty members are categorized as new or existing based on their graduation year, with those graduating after 2019 considered new faculty. In the longitudinal dataset, the first year of employment is regarded as the start of a new faculty member's tenure, while subsequent years classify them as existing faculty.

The ninth and final step of dataset preparation involves obtaining individual longitudinal datasets. These datasets annotate the points in time when individuals enter and leave academia on an annual basis, allowing for the identification of individuals who leave academia each year. By doing so, we can identify instances of attrition.

**4 Data Overview**

After completing data preparation and selecting sample countries from the ORCID dataset, the ORCID data includes 1,348,827 doctoral faculties in the world. The individual-level data from ORCID data include the following basic information: (1) the individuals’ ID, (2) gender of the individuals, (3) whether they are self-hires, (4) whether they are new faculty, (5) the ID of the current institution of employment, (6) the domains and fields of the current department or program, (7) the type of the highest degree, (8) the year in which the highest degree was earned, and (9) the ID of the institution where the highest degree was earned. Institution-level data can be aggregated from individual-level data. Specifically, by considering individuals who have obtained a doctoral degree as the sample population, one can obtain the distribution of total doctoral productions across institutions as well as the employment destinations of these individuals.

Heading

<insert page break here>

**Fig S1**

**Gini Coefficient Across 11 Academic Subcategories in 20 Countries/Regions**

This radar chart illustrates the Gini coefficient distribution across different academic subcategories in 20 selected countries and regions. Each colored line represents one country, showing its relative concentration of academic positions in various disciplines. STEM disciplines (engineering, medicine, and natural sciences) tend to show higher inequality, reinforcing the prestige-based faculty hiring patterns.

<9>

**SI References**

1. S. F. Way, D. B. Larremore, A. Clauset, Gender, productivity, and prestige in computer science faculty hiring networks. Proceedings of the 25th international conference on world wide web, 1169-1179 (2016).
2. M. Henningsson, L. Geschwind, Recruitment of academic staff: An institutional logics perspective. Higher Education Quarterly 76(1), 48–62 (2022).
3. C. J. Gomez, A. C. Herman, P. Parigi, Leading countries in global science increasingly receive more citations than other countries doing similar research. Nature Human Behaviour 6, 919–929 (2022); https://doi.org/10.1038/s41562-022-01351-5
4. A. D. Nevin, Academic hiring networks and institutional prestige: a case study of Canadian sociology. Canadian Review of Sociology 56, 389–420 (2019)
