# Supplementary material for: Global Faculty Networks and U.S. Doctoral Graduates' Monopoly: The Pareto Principle in Academia
Source: Research Square preprint supplement (doi:10.21203/rs.3.rs-6662486/v1), 2025-06-20
Supplement: Supplementary file 2 [file db97dfcb33f85b6d960d90d7.xlsx]

## Sheet: 1 80% PHD graduates
Country/region	Percentage
United States	0.184165
Canada	0.320755
Mexico	0.25
Argentina	0.309524
Brazil	0.164474
Iran	0.230769
Australia	0.387755
China	0.226994
India	0.271462
Japan	0.169355
South Korea	0.235294
Saudi Arabia	0.368421
New Zealand	0.555556
Italy	0.29
Germany	0.378947
Jordan	0.363636
Austria	0.304348
Peru	0.3
Nepal	0.4
Greece	0.4
Azerbaijan	0.6
Ghana	0.333333
Colombia	0.278689
Romania	0.344828
Switzerland	0.3125
Cameroon	0.6
Pakistan	0.347222
Serbia	0.25
Netherlands	0.409091
Turkey	0.232323
Philippines	0.414634
Israel	0.5
Spain	0.295238
France	0.292453
Iraq	0.384615
United Kingdom	0.305556
Bangladesh	0.421053
Denmark	0.363636
Egypt	0.297297
Lebanon	0.571429
Kenya	0.454545
Chile	0.25
Uzbekistan	0.6
Sweden	0.333333
Indonesia	0.235294
Hungary	0.375
Armenia	0.5
Singapore	0.333333
Estonia	0.5
Nigeria	0.267857
Russian Federation	0.350877
Uruguay	0.333333
Ukraine	0.4
Ireland	0.26087
Venezuela	0.363636
Ecuador	0.555556
Cuba	0.4
Uganda	0.5
Norway	0.3
Slovenia	0.4
Sri Lanka	0.416667
Belgium	0.235294
Sudan	0.5
South Africa	0.346154
Belarus	0.5
Bulgaria	0.466667
Croatia	0.4
Cyprus	0.444444
Ethiopia	0.35
Finland	0.294118
Iceland	0.5
Czech Republic	0.409091
Luxembourg	1
Malaysia	0.205882
Poland	0.382353
Portugal	0.24
Thailand	0.363636
United Arab Emirates	0.454545
Georgia	0.666667
Kazakhstan	0.333333
Vietnam	0.46875
Albania	0.666667
North Macedonia	0.666667
Bosnia and Herzegovina	0.4
Latvia	0.5
Lithuania	0.5
Moldova	1
Slovakia	0.4
Algeria	0.533333
Cote d'Ivoire	1
Morocco	0.538462
Tanzania	0.5
Tunisia	0.571429
Panama	0.666667
Costa Rica	0.333333
Paraguay	1
Syria	0.6
Puerto Rico	0.5
Hong Kong	0.571429
Taiwan	0.3

## Sheet: 2 GINI in global countries
Country/region	Percentage
United States	0.735743
Canada	0.588794
Mexico	0.711954
Argentina	0.651664
Brazil	0.780123
Iran	0.701789
Australia	0.541983
China	0.696244
India	0.658359
Japan	0.750498
South Korea	0.708049
Saudi Arabia	0.565928
New Zealand	0.410825
Italy	0.640528
Germany	0.527602
Jordan	0.624066
Austria	0.690474
Peru	0.596814
Nepal	0.52809
Greece	0.559086
Azerbaijan	0.399351
Ghana	0.60488
Colombia	0.688045
Romania	0.58339
Switzerland	0.541138
Cameroon	0.487129
Pakistan	0.589754
Serbia	0.734027
Netherlands	0.461895
Turkey	0.698352
Philippines	0.533087
Israel	0.381164
Spain	0.64142
France	0.630128
Iraq	0.557498
United Kingdom	0.62906
Bangladesh	0.446681
Denmark	0.600885
Egypt	0.613453
Lebanon	0.435516
Kenya	0.470588
Chile	0.691048
Uzbekistan	0.399573
Sweden	0.621471
Indonesia	0.700546
Hungary	0.499463
Armenia	0.353982
Singapore	0.638638
Estonia	0.36478
Nigeria	0.657177
Russian Federation	0.60929
Uruguay	0.629302
Ukraine	0.545696
Ireland	0.645393
Venezuela	0.555731
Ecuador	0.438179
Cuba	0.502564
Uganda	0.397959
Norway	0.645521
Slovenia	0.606649
Sri Lanka	0.5
Belgium	0.720813
Sudan	0.435669
South Africa	0.544593
Belarus	0.550276
Bulgaria	0.493122
Croatia	0.653109
Cyprus	0.400353
Ethiopia	0.621248
Finland	0.648948
Iceland	0
Czech Republic	0.57984
Luxembourg	0
Malaysia	0.668738
Poland	0.566284
Portugal	0.696959
Thailand	0.572891
United Arab Emirates	0.395958
Georgia	0.335223
Kazakhstan	0.602065
Vietnam	0.420468
Albania	0.257218
North Macedonia	0.0869565
Bosnia and Herzegovina	0.556522
Latvia	0.469376
Lithuania	0.481577
Moldova	0.0344828
Slovakia	0.449198
Algeria	0.358871
Cote d'Ivoire	0
Morocco	0.337143
Tanzania	0.467195
Tunisia	0.45993
Panama	0.37037
Costa Rica	0.628889
Paraguay	0.238095
Syria	0.322917
Puerto Rico	0.382609
Hong Kong	0.400445
Taiwan	0.668872

## Sheet: 3 U.S PHD  in other
Country/region	Percentage	Number
United Kingdom	0.169991	2395
China	0.267576	3650
Brazil	0.183791	1313
Canada	0.365941	2555
Australia	0.201211	1296
Colombia	0.123177	735
Germany	0.103069	581
Saudi Arabia	0.176801	945
South Korea	0.6459	3214
Mexico	0.225878	920
Indonesia	0.059846	241
Switzerland	0.126199	500
Sweden	0.101524	373
Taiwan	0.673307	2366
Portugal	0.0818966	285
Malaysia	0.0769904	264
Turkey	0.431569	1419
Chile	0.166148	534
Netherlands	0.118391	365
Spain	0.157247	473
Pakistan	0.0566413	171
Italy	0.135135	375
France	0.10047	278
Denmark	0.109633	305
India	0.333333	843
Ecuador	0.0549111	142
Hong Kong	0.336739	791
Japan	0.314351	690
Iran	0.0892377	199
Vietnam	0.0495719	110
Singapore	0.292762	635
UAE	0.226168	484
Thailand	0.309535	646
Iraq	0.0958179	181
Nigeria	0.040318	71
Bangladesh	0.0664062	119
Austria	0.0815864	144
Egypt	0.177956	310
Ireland	0.105114	185
Belgium	0.0800234	137
Norway	0.118031	199
Jordan	0.283592	420
South Africa	0.158485	226
Finland	0.0860058	118
Israel	0.36	477
New Zealand	0.233002	305
Poland	0.0819234	92
Ethiopia	0.0200803	20
Greece	0.197183	182
Czech Republic	0.0943601	87
Ghana	0.0989011	90
Sri Lanka	0.14023	122
Peru	0.134045	113
Russian Federation	0.132394	94
Qatar	0.226207	164
Kenya	0.123512	83
Cyprus	0.170181	113
Argentina	0.147465	96
Oman	0.0723077	47
Lebanon	0.202922	125
Philippines	0.203571	114
Kuwait	0.403689	197
Tanzania	0.0749465	35
Costa Rica	0.225664	102
Palestine	0.109302	47
Venezuela	0.13835	57
Uganda	0.0962567	36
Luxembourg	0.06469	24
Uruguay	0.0961538	35
Romania	0.0911765	31
Kazakhstan	0.141593	48
Morocco	0.0679012	22
Iceland	0.323899	103
Algeria	0.0185874	5
Ukraine	0.031746	8
Nepal	0.0588235	15
Mozambique	0.015625	4
Estonia	0.0393701	10
Libya	0.0595238	15
Macau	0.107143	27
Zimbabwe	0.0368852	9
Malta	0.0291667	7
Croatia	0.0805085	19
Hungary	0.226496	53
Albania	0.036036	8
Tunisia	0.0355556	8
Yemen	0.00892857	2
Botswana	0.158371	35
Bahrain	0.124402	26
Puerto Rico	0.639594	126
Slovakia	0.0537634	10
Panama	0.172222	31
Lithuania	0.101124	18
Rwanda	0.0467836	8
Sudan	0.0119048	2
Bosnia and Herzegovina	0.030303	5
Serbia	0.146341	24
Malawi	0.113208	18

## Sheet: 4 UK PHD in other
Country/region	Percentage	Number
United Kingdom	0.102354	3105
China	0.113408	1547
Brazil	0.12248	875
Canada	0.120739	843
Australia	0.254153	1637
Colombia	0.0308363	184
Germany	0.129679	731
Saudi Arabia	0.203181	1086
South Korea	0.0492363	245
Mexico	0.130125	530
Indonesia	0.0849267	342
Switzerland	0.106007	420
Sweden	0.117583	432
Taiwan	0.114684	403
Portugal	0.219828	765
Malaysia	0.431613	1480
Turkey	0.240876	792
Chile	0.0933416	300
Netherlands	0.161207	497
Spain	0.158245	476
Pakistan	0.145081	438
Italy	0.212613	590
France	0.106614	295
Denmark	0.136592	380
India	0.127718	323
Ecuador	0.0162413	42
Hong Kong	0.166454	391
Japan	0.137585	302
Iran	0.210762	470
Vietnam	0.032447	72
Singapore	0.137852	299
UAE	0.160748	344
Thailand	0.229995	480
Iraq	0.372155	703
Nigeria	0.258944	456
Bangladesh	0.103795	186
Austria	0.115014	203
Egypt	0.188289	328
Ireland	0.397727	700
Belgium	0.0905374	155
Norway	0.142349	240
Jordan	0.259284	384
South Africa	0.246844	352
Finland	0.140671	193
Israel	0.0807547	107
New Zealand	0.223071	292
Poland	0.118433	133
Ethiopia	0.0200803	20
Greece	0.459372	424
Czech Republic	0.0835141	77
Ghana	0.207692	189
Sri Lanka	0.156322	136
Peru	0.0189798	16
Russian Federation	0.084507	60
Qatar	0.213793	155
Kenya	0.13244	89
Cyprus	0.34488	229
Argentina	0.0491551	32
Oman	0.18	117
Lebanon	0.141234	87
Philippines	0.0642857	36
Kuwait	0.204918	100
Tanzania	0.0920771	43
Costa Rica	0.0486726	22
Palestine	0.134884	58
Venezuela	0.0849515	35
Uganda	0.0962567	36
Luxembourg	0.0781671	29
Uruguay	0.00824176	3
Romania	0.0852941	29
Kazakhstan	0.106195	36
Morocco	0.0308642	10
Iceland	0.163522	52
Algeria	0.0966543	26
Ukraine	0.031746	8
Nepal	0.0352941	9
Mozambique	0.0195312	5
Estonia	0.133858	34
Libya	0.392857	99
Macau	0.107143	27
Zimbabwe	0.045082	11
Cuba	0.00833333	2
Malta	0.679167	163
Croatia	0.0805085	19
Hungary	0.106838	25
Albania	0.0630631	14
Tunisia	0.0266667	6
Yemen	0.0178571	4
Botswana	0.230769	51
Bahrain	0.253589	53
Puerto Rico	0.0203046	4
Slovakia	0.0376344	7
Panama	0.0444444	8
Lithuania	0.179775	32
Rwanda	0.0350877	6
Sudan	0.077381	13
Bosnia and Herzegovina	0.030303	5
Serbia	0.121951	20
Malawi	0.194969	31

## Sheet: 5-a a global-degree centrality
Country/region	Degree centrality
China	0.977011
United States	1.34483
India	0.913793
United Kingdom	1.20115
Canada	1.13793
Germany	1.10345
Brazil	0.804598
France	1.01724
South Korea	0.752874
Spain	1.01149
Japan	0.95977
Italy	1
Australia	1.05172
Switzerland	0.931034
Netherlands	0.977011
Israel	0.597701
Mexico	0.637931
Russian Federation	0.87931
Turkey	0.821839
Iran	0.637931
Sweden	0.965517
Taiwan	0.603448
Belgium	0.977011
Poland	0.787356
Argentina	0.5
Hong Kong	0.609195
Singapore	0.637931
New Zealand	0.735632
Ireland	0.850575
Austria	0.867816
South Africa	0.810345
Greece	0.545977
Colombia	0.545977
Denmark	0.821839
Portugal	0.827586
Egypt	0.666667
Lebanon	0.362069
Hungary	0.666667
Finland	0.827586
Ukraine	0.614943
Chile	0.551724
Pakistan	0.672414
Czech Republic	0.804598
Puerto Rico	0.195402
Malaysia	0.781609
Venezuela	0.327586
Grenada	0.0287356
Peru	0.402299
Norway	0.833333
Thailand	0.505747
Philippines	0.494253
Serbia	0.454023
Romania	0.551724
Nigeria	0.689655
Bangladesh	0.465517
Saudi Arabia	0.655172
Jordan	0.431034
Bulgaria	0.298851
Croatia	0.425287
Cuba	0.402299
Slovenia	0.218391
Ecuador	0.390805
Belarus	0.201149
Syria	0.149425
Sri Lanka	0.316092
Nepal	0.275862
Costa Rica	0.310345
Iraq	0.488506
Morocco	0.402299
Slovakia	0.45977
Dominican Republic	0.0287356
Saint Kitts and Nevis	0.0172414
Armenia	0.132184
Luxembourg	0.408046
Uruguay	0.258621
Guatemala	0.0517241
Tunisia	0.287356
Latvia	0.137931
Ethiopia	0.454023
Kenya	0.390805
Estonia	0.454023
Indonesia	0.45977
Dominica	0.0172414
Kazakhstan	0.367816
Ghana	0.436782
Saint Vincent and the Grenadines	0.00574713
Qatar	0.385057
Trinidad and Tobago	0.0402299
Uganda	0.327586
UAE	0.534483
Cameroon	0.137931
Bosnia and Herzegovina	0.247126
Jamaica	0.0287356
Vietnam	0.41954
Algeria	0.350575
Libya	0.235632
El Salvador	0.0402299
Lithuania	0.327586
Panama	0.201149
Georgia	0.091954
Sudan	0.298851
Barbados	0.00574713
Palestine	0.333333
Iceland	0.298851
Cyprus	0.45977
Uzbekistan	0.0862069
Macau	0.218391
Antigua and Barbuda	0.00574713
North Macedonia	0.091954
Moldova	0.0632184
Bolivia	0.0747126
Honduras	0.0344828
Afghanistan	0.0344828
Bahrain	0.235632
Myanmar	0.0402299
Malta	0.241379
Senegal	0.0632184
Haiti	0.0229885
Azerbaijan	0.0574713
Tanzania	0.33908
Kuwait	0.270115
Albania	0.235632
Gambia	0.0114943
Belize	0.0114943
Oman	0.33908
Madagascar	0.0229885
Mozambique	0.195402
Botswana	0.241379
Paraguay	0.0344828
Rwanda	0.241379
Benin	0.0402299
Central Africa	0.0114943
Kyrgyzstan	0.0344828
Cambodia	0.0402299
Côte d'Ivoire	0.0344828
Burkina Faso	0.0344828
Mauritius	0.0287356
Zimbabwe	0.195402
South Sudan	0.0114943
Brunei	0.114943
Sierra Leone	0.0114943
Mongolia	0.0517241
Nicaragua	0.0574713
Niger	0.0172414
Vatican	0.0689655
DRC	0.0574713
Laos	0.0114943
Angola	0.0229885
Togo	0.0172414
Zambia	0.0402299
Malawi	0.178161
Fiji	0.0172414
Papua New Guinea	0.00574713
Congo (Brazzaville)	0.0114943
Comoros	0.00574713
Tajikistan	0.0172414
Yemen	0.155172
Guyana	0.0172414
Liechtenstein	0.0229885
Cape Verde	0.0114943
Mali	0.00574713
Andorra	0.00574713
San Marino	0.00574713
Swaziland	0.0229885
Montenegro	0.0229885
Maldives	0.00574713
Vanuatu	0.00574713
Seychelles	0.00574713
Niue	0.00574713
Eritrea	0.00574713
Lesotho	0.00574713
Somalia	0.00574713
Burundi	0.0114943
Turkmenistan	0.00574713
Gabon	0.0114943

## Sheet: 5-b  global-betwn scentrality
Country/region	Betweenness centrality
China	0.0107907
United States	0.0116337
India	0.0259624
United Kingdom	0.00255905
Canada	0.00916109
Germany	0.00449307
Brazil	0.0113403
France	0.00296967
South Korea	0.00604007
Spain	0.00776895
Japan	0.00926032
Italy	0.00871433
Australia	0.0130078
Switzerland	0.0115497
Netherlands	0.00370527
Israel	0.00659795
Mexico	0.00380594
Russian Federation	0.0112819
Turkey	0.0084556
Iran	0.00493499
Sweden	0.00668983
Taiwan	0.0114329
Belgium	0.00709481
Poland	0.00687531
Argentina	0.00915349
Hong Kong	0.00934356
Singapore	0.00615717
New Zealand	0.0104009
Ireland	0.00773803
Austria	0.00597709
South Africa	0.0180296
Greece	0.00770641
Colombia	0.0117458
Denmark	0.00820425
Portugal	0.0104731
Egypt	0.0108334
Lebanon	0.00605576
Hungary	0.00440765
Finland	0.0150562
Ukraine	0.0268042
Chile	0.00359114
Pakistan	0.0220744
Czech Republic	0.00665984
Puerto Rico	0.00121507
Malaysia	0.00685347
Venezuela	0.00649349
Grenada	0
Peru	0.00857468
Norway	0.0166429
Thailand	0.00311881
Philippines	0.014134
Serbia	0.0035074
Romania	0.013333
Nigeria	0.0338324
Bangladesh	0.00544322
Saudi Arabia	0.0102634
Jordan	0.00334825
Bulgaria	0
Croatia	0.00914282
Cuba	0.010793
Slovenia	0
Ecuador	0.00329138
Belarus	0
Syria	0
Sri Lanka	0.00297529
Nepal	0.00268754
Costa Rica	0.00478246
Iraq	0.0103964
Morocco	0.0178498
Slovakia	0.0124508
Dominican Republic	0
Saint Kitts and Nevis	0
Armenia	0
Luxembourg	0.00797825
Uruguay	0.00674849
Guatemala	0
Tunisia	0.00664274
Latvia	0
Ethiopia	0.011118
Kenya	0.00703733
Estonia	0.00344744
Indonesia	0.00469889
Dominica	0
Kazakhstan	0.00653031
Ghana	0.00749823
Saint Vincent and the Grenadines	0
Qatar	0.0022019
Trinidad and Tobago	0
Uganda	0.00255936
UAE	0.011543
Cameroon	0
Bosnia and Herzegovina	0.00402585
Jamaica	0
Vietnam	0.0030252
Algeria	0.00883494
Libya	0.00576521
El Salvador	0
Lithuania	0.00909927
Panama	0.00330132
Georgia	0
Sudan	0.0139236
Barbados	0
Palestine	0.00300621
Iceland	0.0063166
Cyprus	0.0126169
Uzbekistan	0
Macau	0.00515782
Antigua and Barbuda	0
North Macedonia	0
Moldova	0
Bolivia	0
Honduras	0
Afghanistan	0
Bahrain	0.00267753
Myanmar	0
Malta	0.00560762
Senegal	0
Haiti	0
Azerbaijan	0
Tanzania	0.00456573
Kuwait	0.000569042
Albania	0.00409734
Gambia	0
Belize	0
Oman	0.00386636
Madagascar	0
Mozambique	0.00318996
Botswana	0.00695414
Paraguay	0
Rwanda	0.0122989
Benin	0
Central Africa	0
Kyrgyzstan	0
Cambodia	0
Côte d'Ivoire	0
Burkina Faso	0
Mauritius	0
Zimbabwe	0.0106999
South Sudan	0
Brunei	0
Sierra Leone	0
Mongolia	0
Nicaragua	0
Niger	0
Vatican	0
DRC	0
Laos	0
Angola	0
Togo	0
Zambia	0
Malawi	0.00230565
Fiji	0
Papua New Guinea	0
Congo (Brazzaville)	0
Comoros	0
Tajikistan	0
Yemen	0.00529857
Guyana	0
Liechtenstein	0
Cape Verde	0
Mali	0
Andorra	0
San Marino	0
Swaziland	0
Montenegro	0
Maldives	0
Vanuatu	0
Seychelles	0
Niue	0
Eritrea	0
Lesotho	0
Somalia	0
Burundi	0
Turkmenistan	0
Gabon	0

## Sheet: 5-c global-eigenvector cen
Country/region	Eigenvector centrality
China	0.405397
United States	0.570384
India	0.0863946
United Kingdom	0.301909
Canada	0.247207
Germany	0.107775
Brazil	0.163331
France	0.0527187
South Korea	0.242972
Spain	0.0669914
Japan	0.0769805
Italy	0.0626121
Australia	0.192011
Switzerland	0.0794662
Netherlands	0.0653968
Israel	0.0437006
Mexico	0.103169
Russian Federation	0.0123831
Turkey	0.133297
Iran	0.0513685
Sweden	0.0710451
Taiwan	0.182342
Belgium	0.0293569
Poland	0.0177751
Argentina	0.0126652
Hong Kong	0.100337
Singapore	0.0798393
New Zealand	0.0430912
Ireland	0.0476563
Austria	0.0311063
South Africa	0.035623
Greece	0.0298555
Colombia	0.100814
Denmark	0.0584663
Portugal	0.0714793
Egypt	0.0479105
Lebanon	0.0151175
Hungary	0.00556392
Finland	0.0255318
Ukraine	0.00168122
Chile	0.0680737
Pakistan	0.0848018
Czech Republic	0.013946
Puerto Rico	0.00920312
Malaysia	0.0944884
Venezuela	0.00798025
Grenada	5.5316e-84
Peru	0.0153709
Norway	0.0345526
Thailand	0.0731585
Philippines	0.014409
Serbia	0.00303829
Romania	0.00493451
Nigeria	0.03438
Bangladesh	0.0402443
Saudi Arabia	0.138172
Jordan	0.0495687
Bulgaria	5.5316e-84
Croatia	0.00300486
Cuba	0.00220641
Slovenia	5.5316e-84
Ecuador	0.0261104
Belarus	5.5316e-84
Syria	5.5316e-84
Sri Lanka	0.0231571
Nepal	0.00483755
Costa Rica	0.0110223
Iraq	0.048798
Morocco	0.00478115
Slovakia	0.00187297
Dominican Republic	5.5316e-84
Saint Kitts and Nevis	5.5316e-84
Armenia	5.5316e-84
Luxembourg	0.0055594
Uruguay	0.00537044
Guatemala	5.5316e-84
Tunisia	0.00233285
Latvia	5.5316e-84
Ethiopia	0.0147627
Kenya	0.0142349
Estonia	0.00344019
Indonesia	0.0766187
Dominica	5.5316e-84
Kazakhstan	0.0069987
Ghana	0.0229195
Saint Vincent and the Grenadines	5.5316e-84
Qatar	0.0211869
Trinidad and Tobago	5.5316e-84
Uganda	0.00583059
UAE	0.0601857
Cameroon	5.5316e-84
Bosnia and Herzegovina	0.000923338
Jamaica	5.5316e-84
Vietnam	0.0401656
Algeria	0.00304572
Libya	0.00605377
El Salvador	5.5316e-84
Lithuania	0.00284642
Panama	0.00347917
Georgia	5.5316e-84
Sudan	0.00409669
Barbados	5.5316e-84
Palestine	0.00827338
Iceland	0.0103957
Cyprus	0.0188646
Uzbekistan	5.5316e-84
Macau	0.00721345
Antigua and Barbuda	5.5316e-84
North Macedonia	5.5316e-84
Moldova	5.5316e-84
Bolivia	5.5316e-84
Honduras	5.5316e-84
Afghanistan	5.5316e-84
Bahrain	0.00487809
Myanmar	5.5316e-84
Malta	0.00688766
Senegal	5.5316e-84
Haiti	5.5316e-84
Azerbaijan	5.5316e-84
Tanzania	0.00968344
Kuwait	0.0190023
Albania	0.00202834
Gambia	5.5316e-84
Belize	5.5316e-84
Oman	0.0125021
Madagascar	5.5316e-84
Mozambique	0.00334452
Botswana	0.00540123
Paraguay	5.5316e-84
Rwanda	0.00279407
Benin	5.5316e-84
Central Africa	5.5316e-84
Kyrgyzstan	5.5316e-84
Cambodia	5.5316e-84
Côte d'Ivoire	5.5316e-84
Burkina Faso	5.5316e-84
Mauritius	5.5316e-84
Zimbabwe	0.00223517
South Sudan	5.5316e-84
Brunei	5.5316e-84
Sierra Leone	5.5316e-84
Mongolia	5.5316e-84
Nicaragua	5.5316e-84
Niger	5.5316e-84
Vatican	5.5316e-84
DRC	5.5316e-84
Laos	5.5316e-84
Angola	5.5316e-84
Togo	5.5316e-84
Zambia	5.5316e-84
Malawi	0.00334064
Fiji	5.5316e-84
Papua New Guinea	5.5316e-84
Congo (Brazzaville)	5.5316e-84
Comoros	5.5316e-84
Tajikistan	5.5316e-84
Yemen	0.00300923
Guyana	5.5316e-84
Liechtenstein	5.5316e-84
Cape Verde	5.5316e-84
Mali	5.5316e-84
Andorra	5.5316e-84
San Marino	5.5316e-84
Swaziland	5.5316e-84
Montenegro	5.5316e-84
Maldives	5.5316e-84
Vanuatu	5.5316e-84
Seychelles	5.5316e-84
Niue	5.5316e-84
Eritrea	5.5316e-84
Lesotho	5.5316e-84
Somalia	5.5316e-84
Burundi	5.5316e-84
Turkmenistan	5.5316e-84
Gabon	5.5316e-84

## Sheet: 6-a US PHD graduate flow
Parent	Child	Num.
Top	Stayed_US	407
Top	Left_US	15079
Sub-Top	Stayed_US	182
Sub-Top	Left_US	7431
Ordinary	Stayed_US	68
Ordinary	Left_US	3751

## Sheet: 6-b US PHD in top flow
Parent	Child	Num.
Top	Stayed_US	325
Top	Left_US	13779
Sub-Top	Stayed_US	131
Sub-Top	Left_US	6343
Ordinary	Stayed_US	57
Ordinary	Left_US	3136

## Sheet: 7 Top 10 Monopoly Uni 
Rank	University	State	Graduates	Percentage (%)
1	UC Berkeley	California	898	94.83
2	University of Illinois at Urbana-Champaign	Illinois	777	90.88
3	Harvard University	Massachusetts	723	95.01
4	MIT	Massachusetts	631	96.9
5	Stanford University	California	582	95.57
6	University of Michigan, Ann Arbor	Michigan	559	93.32
7	Cornell University	New York	557	93.3
8	University of Wisconsin-Madison	Wisconsin	546	92.54
9	University of Texas at Austin	Texas	517	91.18
10	Purdue University-West Lafayette	Indiana	488	91.39

[truncated: 4 more sheets: 8 Count & reg' Gini over 0.5, 9 gender disparities, 10 Gini Coefficient with time, S1]
